# Supplementary material
Source: publisher figshare collection journal article supplement (https://acs.figshare.com/ndownloader/files/4100899)
Supplement: Supplementary file 1 [file 4100899]

# Supporting Information

## Size-Controlled Synthesis of Bifunctional Magnetic and Ultraviolet Optical Rock-Salt MnS Nanocube Superlattices

Xinyi Yang,<sup>†</sup> Yingnan Wang,<sup>†</sup> Yongming Sui,<sup>a</sup> Xiaoli Huang,<sup>†</sup> Tian Cui,<sup>†</sup> Chunzhong Wang,<sup>‡</sup> Bingbing

Liu,<sup>†</sup> Guangtian Zou,<sup>†</sup> and Bo Zou<sup>\*,†</sup>

<sup>†</sup> State key Laboratory of Superhard Materials, Jilin University, Changchun, 130012, China.

E-mail: zoubo@jlu.edu.cn,

<sup>‡</sup> Key Laboratory of Physics and Technology for Advanced Batteries (Ministry of Education), College of Physics, Jilin University, Changchun, 130012, China

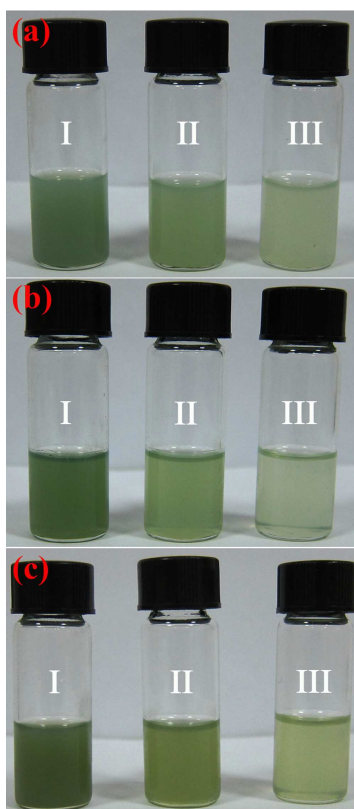

**Figure S1** Digital photographs of the as-synthesized RS-MnS nanocubes dispersed in hexane (a), chloroform (b), and toluene (c) with different concentrations: (I) 4.5 M; (II) 2.2 M; (III) 0.6 M.

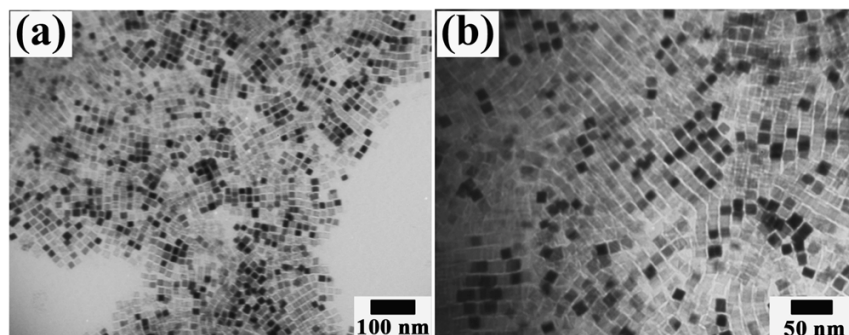

**Figure S2** TEM images of RS-MnS nanocube superlattices obtained at 250 °C for 30 min: (a) the simple-cubic packing lattice, (b) the 1D shifted simple-cubic packing pattern.

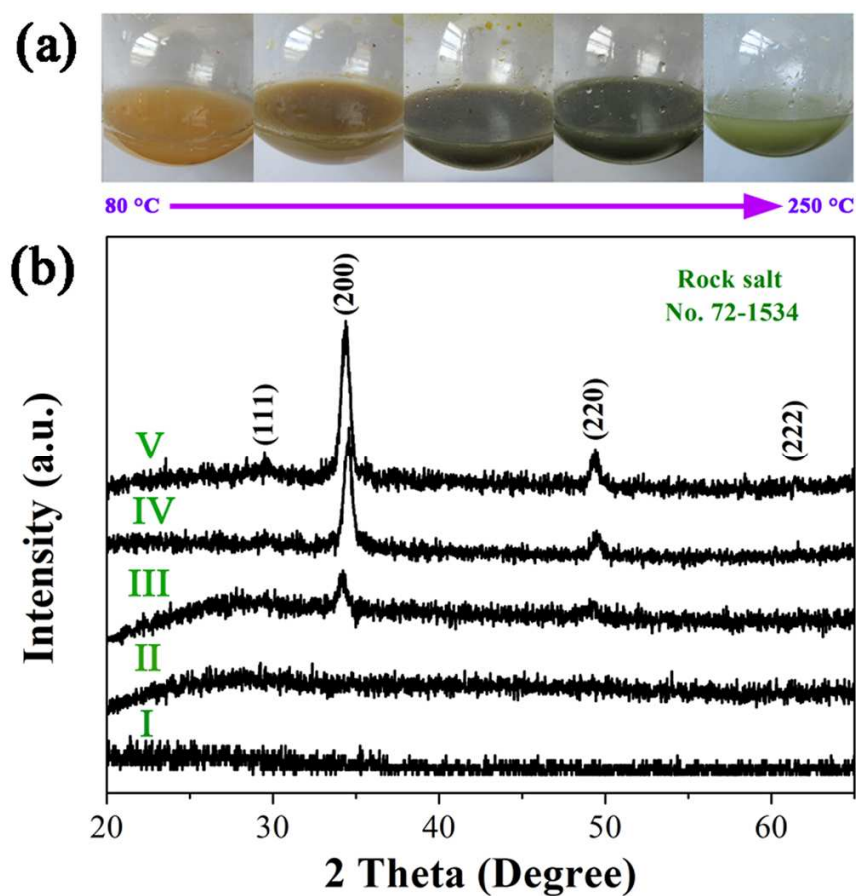

**Figure S3** (a) Digital photographs of the phenomena occurring at different reaction durations. (b) XRD patterns of the sample obtained at different reaction temperatures: (I) 80 °C, (II) 90 °C, (III) 100 °C, (IV) 150 °C, (V) 200 °C.

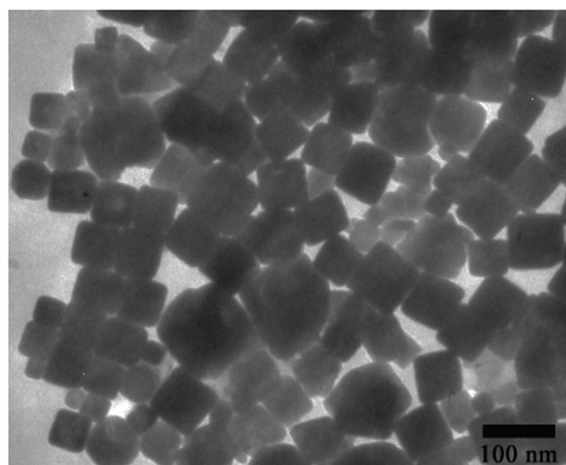

**Figure S4** A TEM image of RS-MnS nanocubes obtained at 250 °C for 180 min.

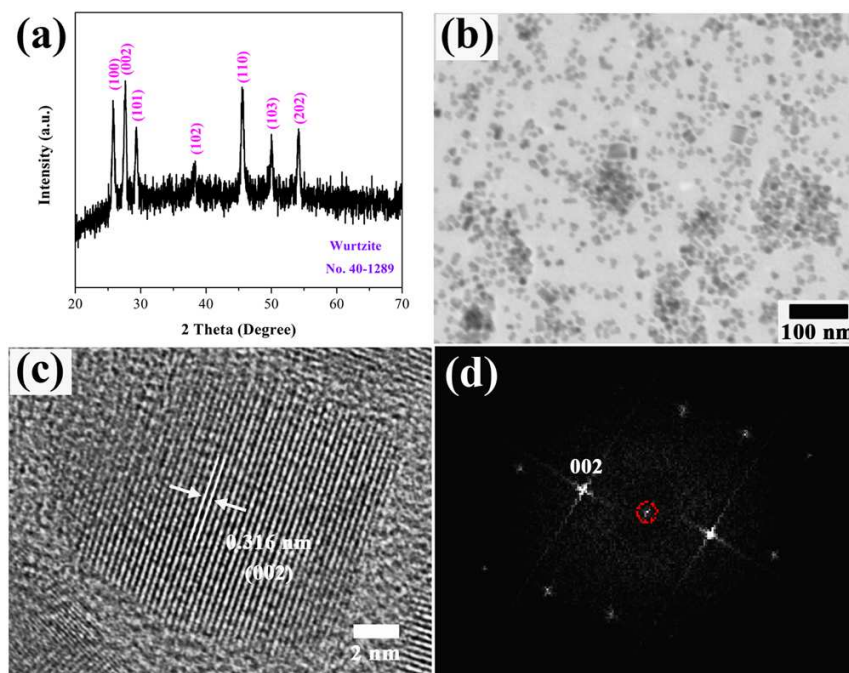

**Figure S5** WZ-MnS nanorods obtained at 250 °C for 30 min (a) XRD patterns; (b) TEM images; (c) HRTEM images; (d) corresponding FFT patterns.

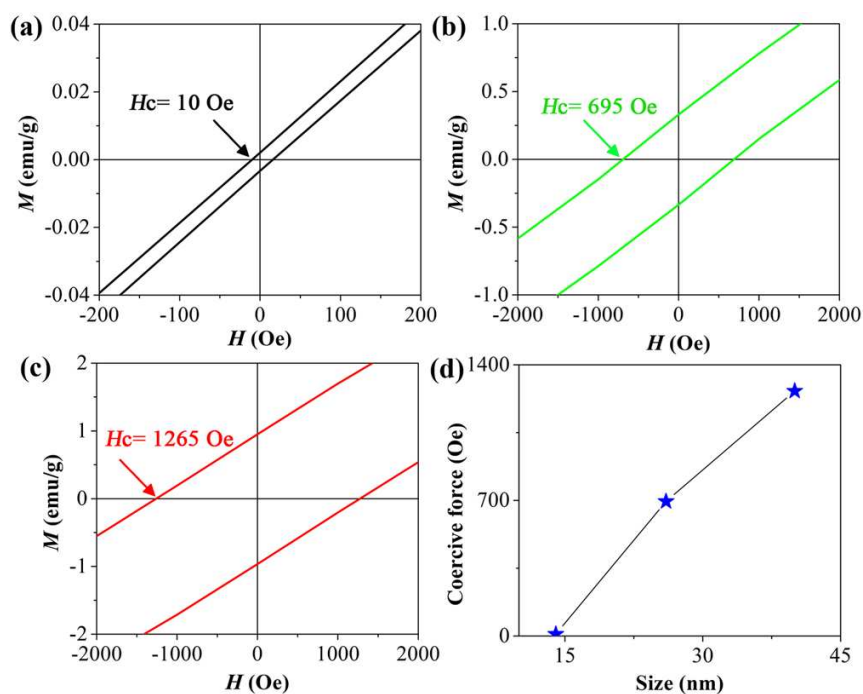

**Figure S6** (a), (b) and (c) show the region around zero fields for 14, 26, 40 nm RS-MnS nanocubes measured at 5 K and 30 KOe, respectively. (d) The variation of coercive force with different edge length in the nanocubes.
